# Supplementary material for: Immune profiling and prognostic model of pancreatic cancer using quantitative pathology and single-cell RNA sequencing
Source: PubMed Central journal article supplement (PMC10031915; doi:10.1186/s12967-023-04051-4), 2023-03-21
Supplement: 12967_2023_4051_MOESM1_ESM.pdf [file 12967_2023_4051_MOESM1_ESM.pdf]

## Supplemental Text and Figures

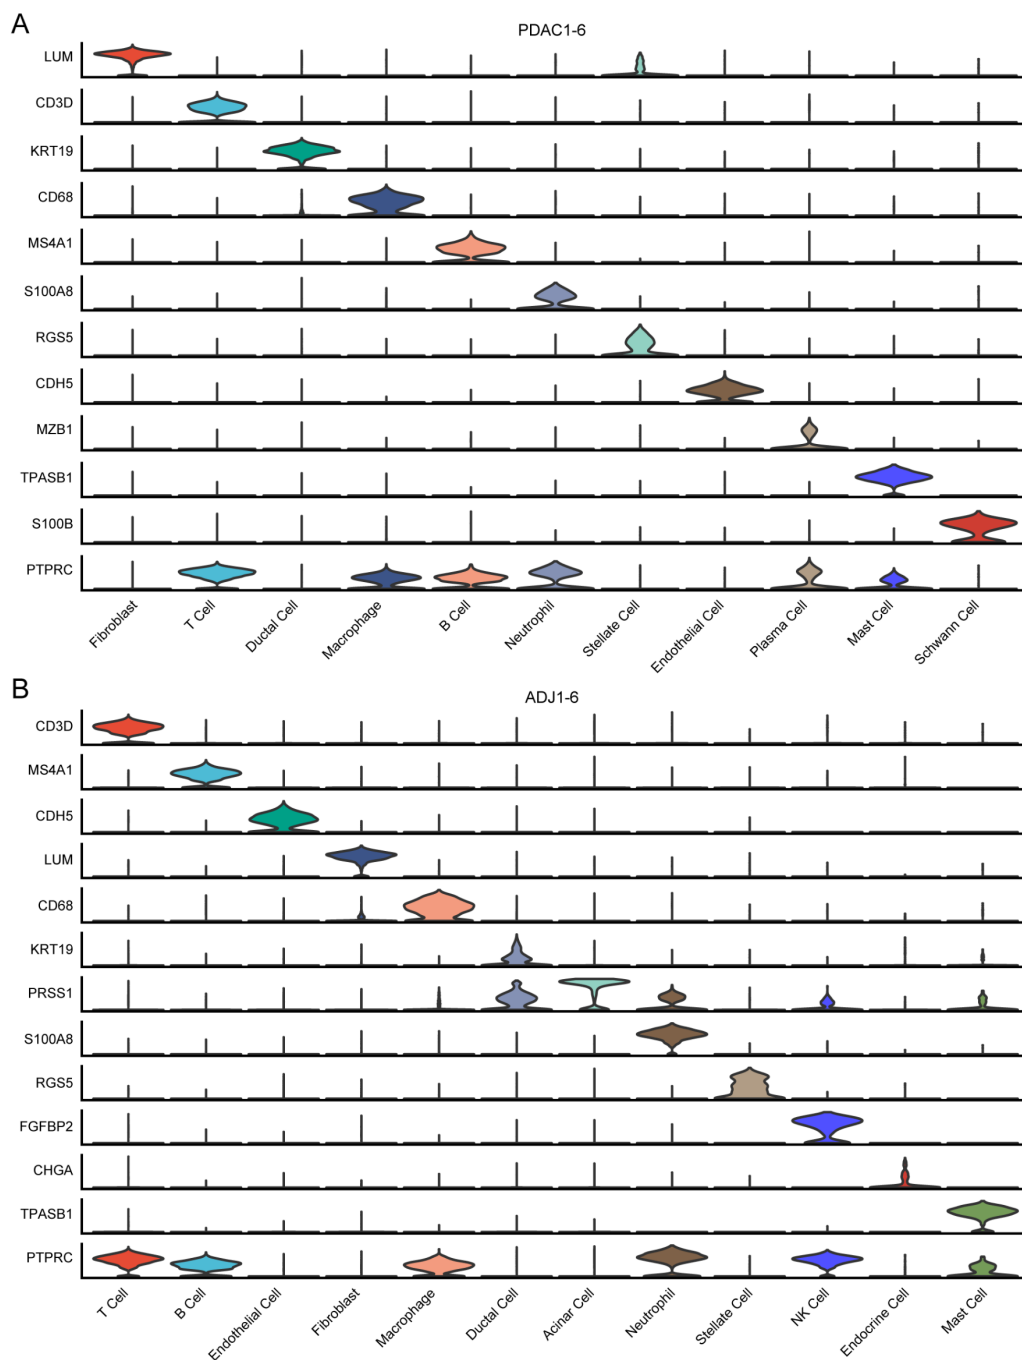

**Fig.S1 Identification of cell types.** (A-B) Violin plots showing the normalized expression levels of known signature genes of distinct cell populations in PDAC (A) and adjacent noncancerous tissues (B).

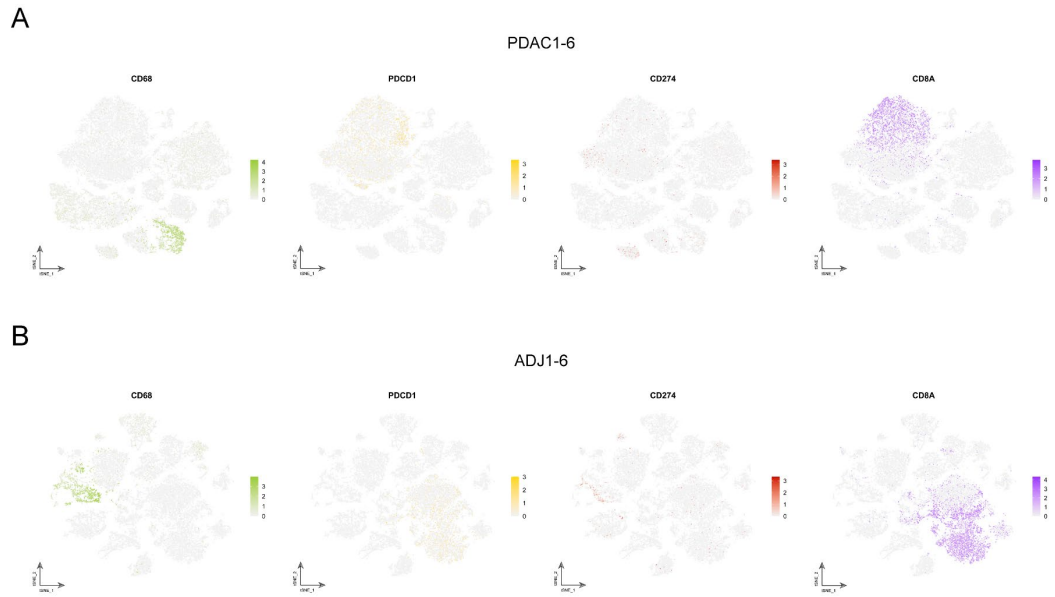

**Fig.S2 Expression and distribution of immune markers.** (A-B) The distribution of CD68+, PDCD1+ (PD1+), CD274+ (PD-L1+), CD8A+ (CD8+) cells in PDAC (A) and adjacent noncancerous tissues (B). The intensity of colors (from white to specific colors) indicated the average expression level of immune markers.

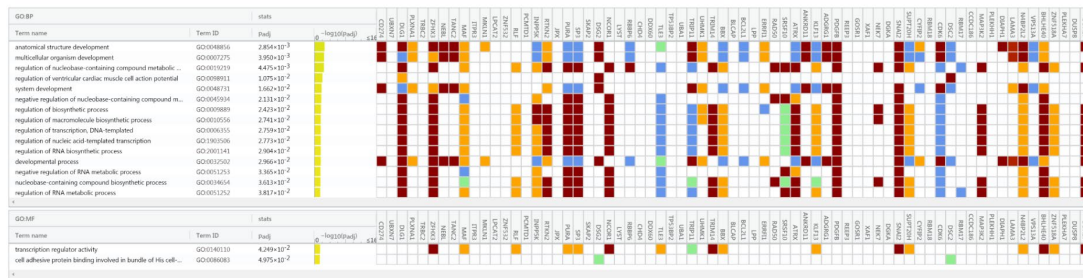

**Fig.S3 Gene annotation analysis of differentially expressed genes (DEGs) between PD-L1+ and PD-L1- tumor cells.** Biological process (A), and Molecular function (B). Top GO terms were shown. Bar plots are colored according to their  $-\log_{10}P$ -values. Heatmaps showing the expression levels of top 80 DEGs.
